# Supplementary material for: Response of Maize Seedlings to Silicon Dioxide Nanoparticles (SiO2NPs) under Drought Stress
Source: MDPI journal article supplement (doi:10.3390/plants12142592), 2023-07-08
Supplement: s1 [file s1]

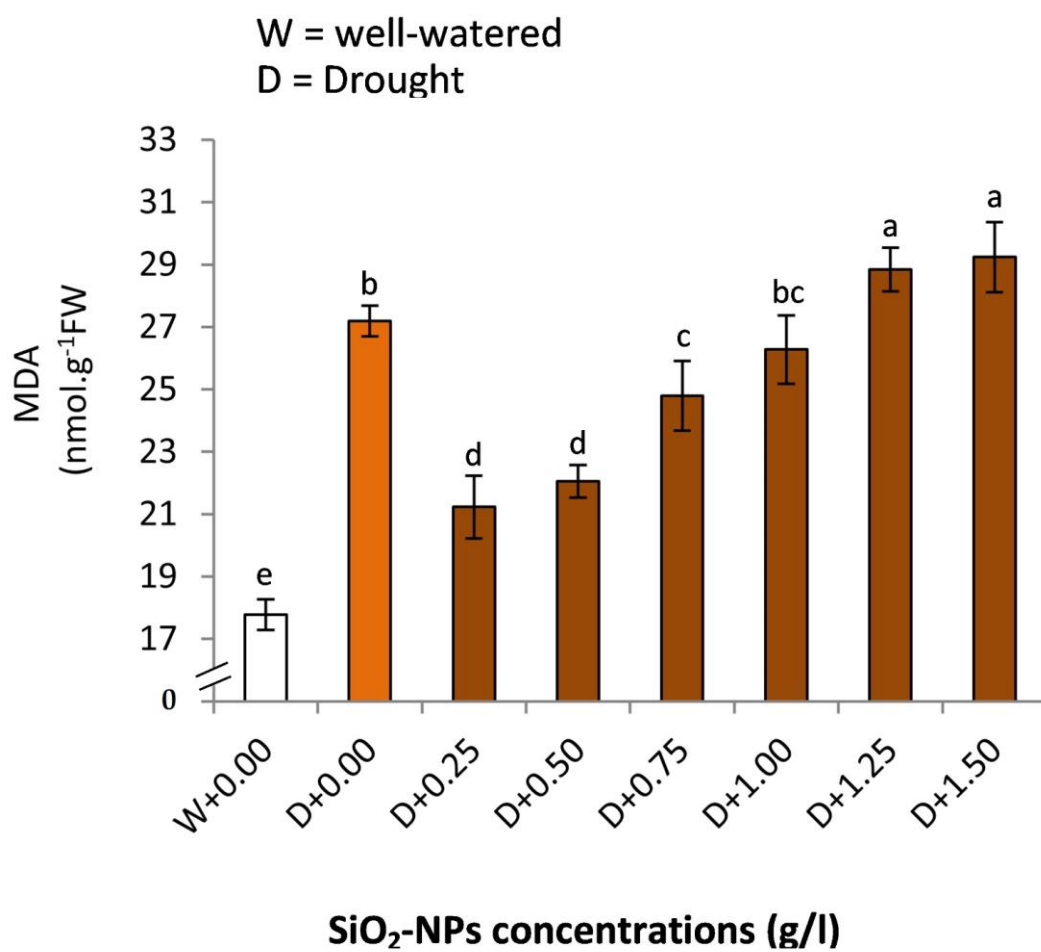

Figure S1. Effect of different concentrations of water and SiO<sub>2</sub>NPs on the membrane lipid oxidation of maize seedlings grown under control and drought stress
